# Supplementary material
Source: PubMed Central journal article supplement (PMC4870001)
Supplement: NIHMS786149-supplement-Supplement.pdf [file NIHMS786149-supplement-Supplement.pdf]

CIRCADIAN RHYTHM

## **Timing of expression of the core clock gene *Bmal1* influences its effects on aging and survival**

**Authors:** Guangrui Yang<sup>1†</sup>, Lihong Chen<sup>1†</sup>, Gregory R. Grant<sup>1,2</sup>, Georgios Paschos<sup>1</sup>, Wen-Liang Song<sup>1</sup>, Erik S. Musiek<sup>3</sup>, Vivian Lee<sup>4</sup>, Sarah C. McLoughlin<sup>1</sup>, Tilo Grosser<sup>1</sup>, George Cotsarelis<sup>5</sup>, and Garret A. FitzGerald<sup>1\*</sup>

<sup>1</sup>The Institute for Translational Medicine and Therapeutics, Perelman School of Medicine, University of Pennsylvania, Philadelphia, PA 19104, USA.

<sup>2</sup>Department of Genetics, University of Pennsylvania, Philadelphia, PA 19104, USA.

<sup>3</sup>Hope Center for Neurological Disorders, Washington University School of Medicine, St. Louis, MO 63110, USA.

<sup>4</sup>Department of Ophthalmology, University of Pennsylvania Scheie Eye Institute, Philadelphia, PA 19104, USA.

<sup>5</sup>Department of Dermatology, Perelman School of Medicine, University of Pennsylvania, PA 19104, USA.

\*Corresponding author. E-mail: [garret@upenn.edu](mailto:garret@upenn.edu)

†These authors contributed equally to this work.

## ABSTRACT

The absence of *Bmal1*, a core clock gene, results in a loss of circadian rhythms, an acceleration of aging, and a shortened life span in mice. To address the importance of circadian rhythms in the aging process, we generated conditional *Bmal1* knockout mice that lacked the BMAL1 protein during adult life and found that wild-type circadian variations in wheel-running activity, heart rate, and blood pressure were abolished. Ocular abnormalities and brain astrogliosis were conserved irrespective of the timing of *Bmal1* deletion. However, life span, fertility, body weight, blood glucose levels, and age-dependent arthropathy - which are altered in standard *Bmal1* knockout mice - remained unaltered, while atherosclerosis and hair growth improved, in the conditional adult-life *Bmal1* knockout mice, despite abolition of clock function in both groups. Hepatic RNA-Seq revealed that expression of oscillatory genes was dampened in the adult-life *Bmal1* knockout mice, while overall gene expression was largely unchanged. Thus, many phenotypes in conventional *Bmal1* knockout mice, hitherto attributed to disruption of circadian rhythms, reflect the loss of properties of BMAL1 that are independent of its role in the clock. These findings prompt re-evaluation of the systemic consequences of disruption of the molecular clock.

### **This PDF file includes:**

Fig. S1. Validation of *Bmal1* deletion and dampening effect of other clock genes

Fig. S2. Wheel-running activity, body weight, and fertility in cKO mice

Fig. S3. Life span of iKO, cKO, and nKO mice

Fig. S4. mRNA levels of *Ccnd1* and *Mki67* in skin

Fig. S5. Other parameters in HFD-fed mice

Fig. S6. iKO mice display similar *Gfap* induction in the brain as cKO

Fig. S7. RNA-Seq results revealed dampening effect in core clock genes in iKO mice

Table S1. Top 20 oscillating hepatic genes (JTK\_CYCLE  $q$ -value) in Ctrl mice show no circadian pattern in iKO mice

Table S2. The ratio of differentially expressed gene numbers in cKO strain to the numbers in iKO strain

Table S3. Summary of phenotypes of cKO and iKO mice

Data file S1. Circadian transcriptome

Data file S2. Differentially expressed genes irrespective of time points

Data file S3. Phenotype enrichment analysis of differentially expressed genes

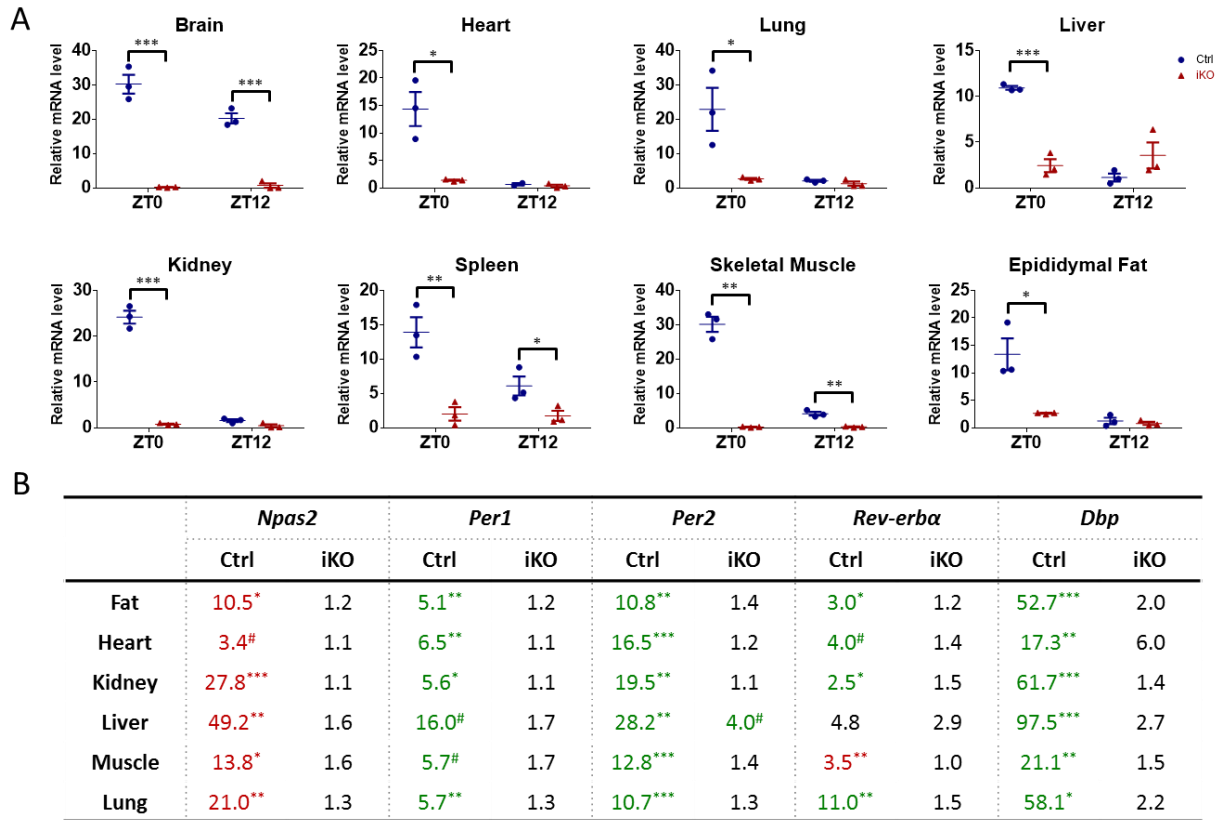

**Fig. S1. Validation of *Bmal1* deletion and dampening effect of other clock genes.** (A) Brain, heart, lung, liver, kidney, spleen, skeletal muscle, and epididymal fat were collected at ZT0 and ZT12. The *Bmal1* mRNA levels were determined using qRT-PCR and compared between Ctrl and iKOs (2-way ANOVA; \*,  $P < 0.05$ ; \*\*,  $P < 0.01$ ; \*\*\*,  $P < 0.001$ ). (B) The fold change of clock gene expression levels in various tissues in Ctrl and iKO mice between ZT0 and ZT12 (Student's t-test, ZT0 vs. ZT12; #,  $P < 0.1$ ; \*,  $P < 0.05$ ; \*\*,  $P < 0.01$ ; \*\*\*,  $P < 0.001$ ; Red, ZT0 > ZT12; Green, ZT0 < ZT12; Black, no significant difference).

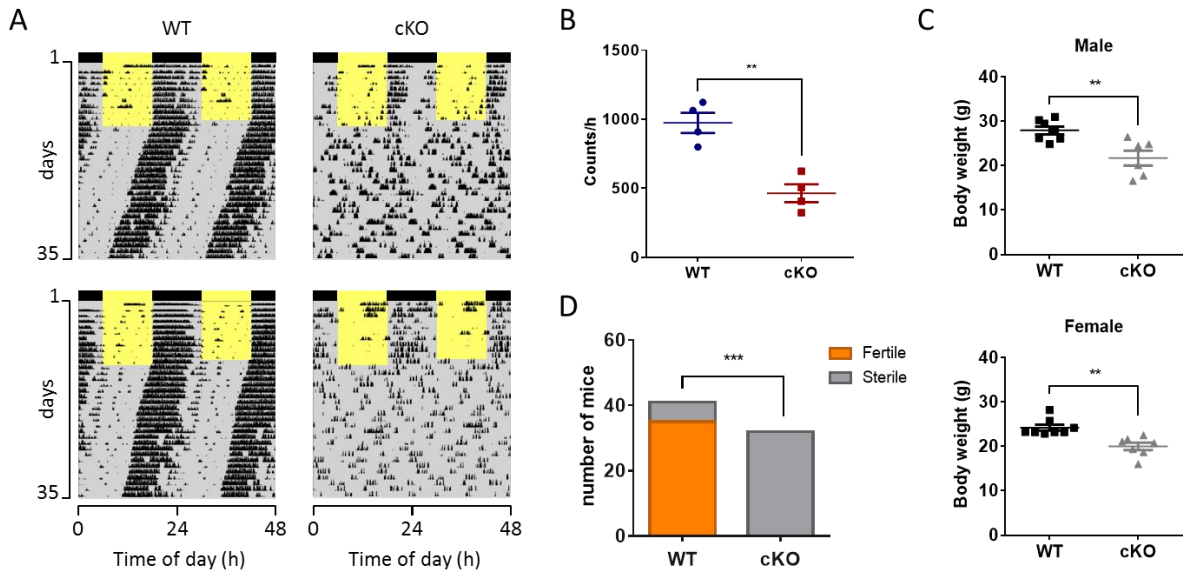

**Fig. S2. Wheel-running activity, body weight, and fertility in cKO mice.** (A) Representative activity records of individual WT and cKO littermates aged 3m are presented in double-plotted format. (B) Individual value plot of wheel running activity from WT and cKO mice under DD (Student's t-test; \*\*,  $P < 0.01$ ). (C) Body weight of 6m old male and female mice (Student's t-test; \*\*,  $P < 0.01$ ). (D) Fertility analysis of WT and cKO mice (male and female combined,  $\chi^2$  test; \*\*\*,  $P < 0.001$ ).

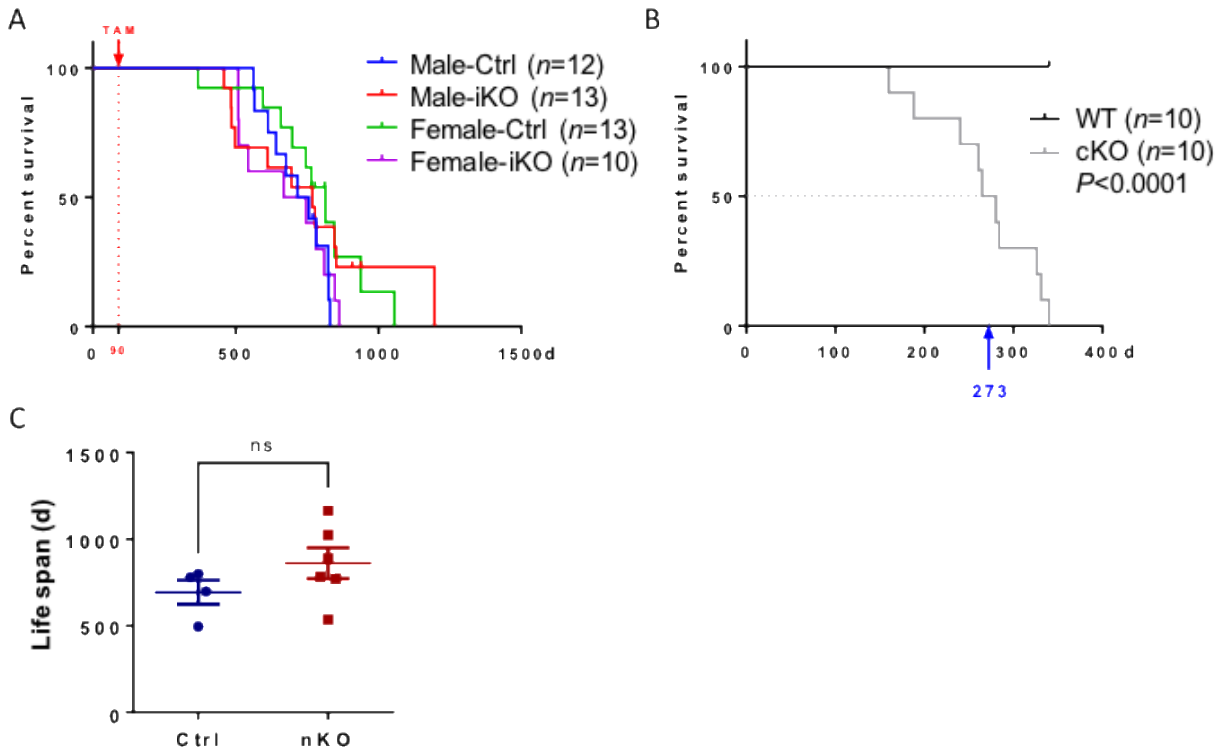

**Fig. S3. Life span of iKO, cKO, and nKO mice.** (A) Both male and female mice at 3 m old were treated with TAM (red arrow) and their life span was monitored for comparison (log-rank test; no significant difference between any 2 groups). (B) life span of cKOs. All WT mice at 340 d old were euthanized when last cKO mouse died (log-rank test;  $P < 0.0001$ ). (C) The life span of nKOs and their littermate controls (Student's t-test; ns, no significant difference).

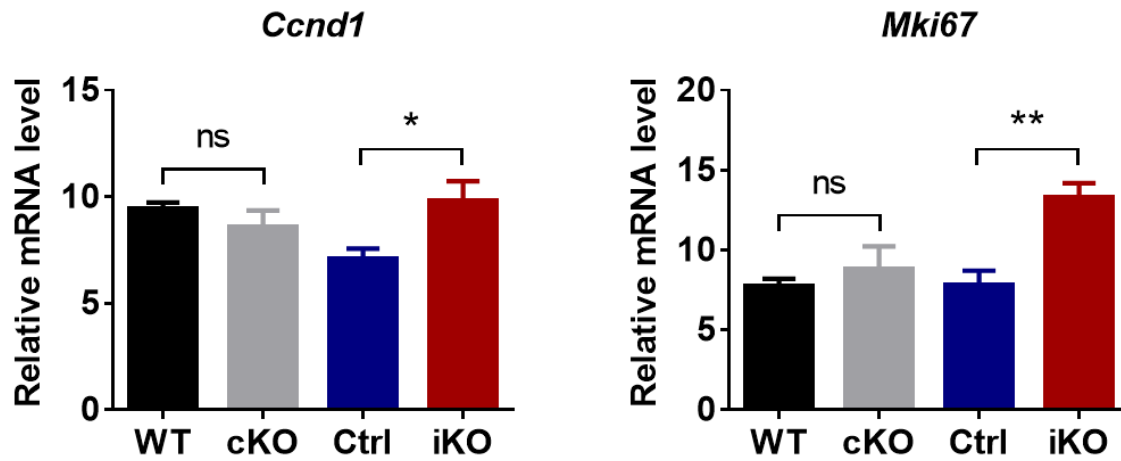

**Fig. S4. mRNA levels of *Ccnd1* and *Mki67* in skin.** Skin samples from both cKO and iKO and their littermates were used for qRT-PCR ( $N=6$ , Student's t-test; ns, no significant difference; \*,  $P<0.05$ ; \*\*,  $P<0.01$ ).

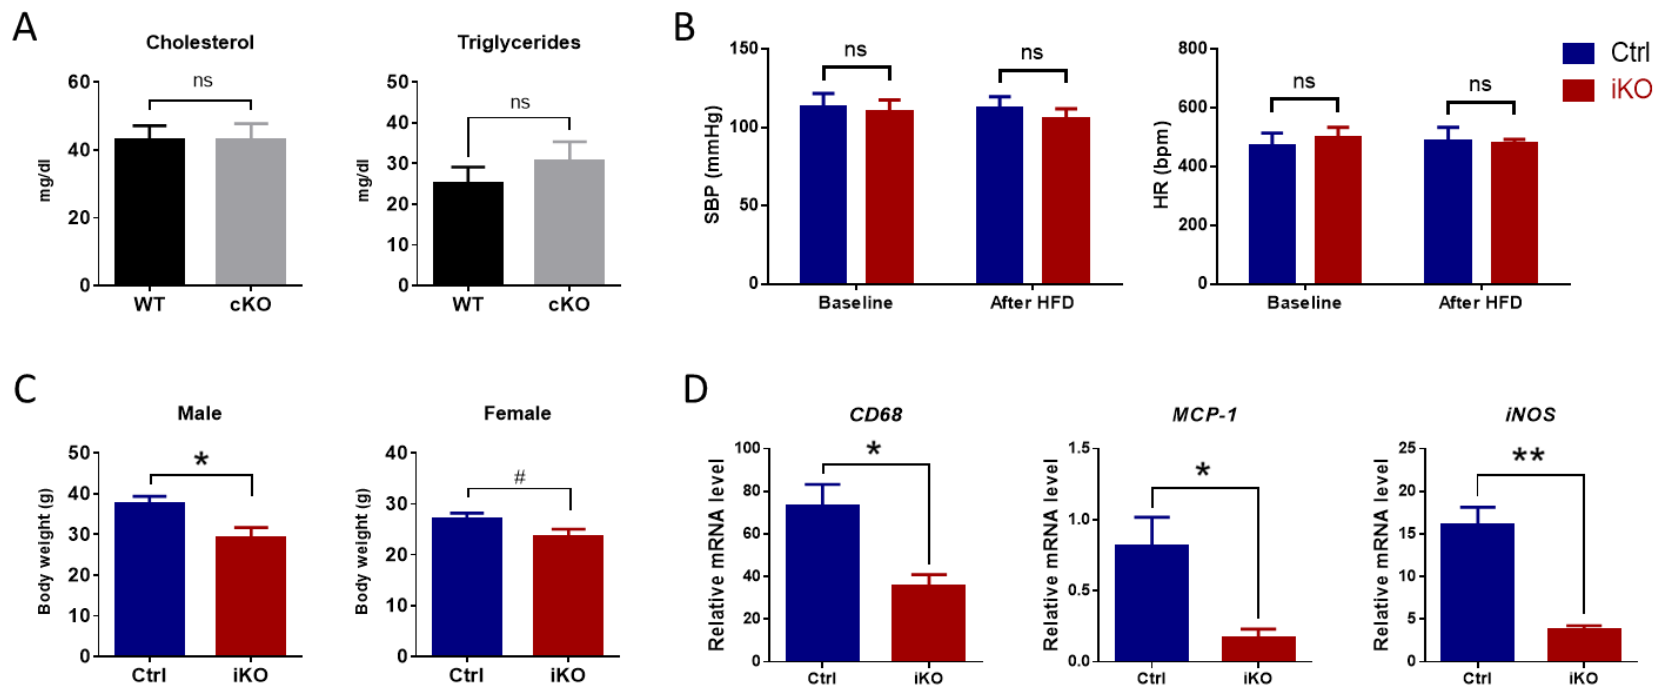

**Fig. S5. Other parameters in HFD-fed mice.** (A) Total cholesterol and triglycerides in cKO plasmas ( $N=5$ ). (B) SBP and HR of Ctrl and iKO mice were measured by tail cuff at ZT8-9 before or after 2 m HFD treatment ( $N=6$  to 8). (C) Body weights of both male ( $N=14$ ) and female ( $N=8$  to 12) mice. (D) qRT-PCR analysis of *CD68*, *MCP-1* and *iNOS* expression in aortas from iKO mice ( $N=4$ ). Student's t-test was used for all comparisons (#,  $P<0.1$ ; \*,  $P<0.05$ ; \*\*,  $P<0.01$ ).



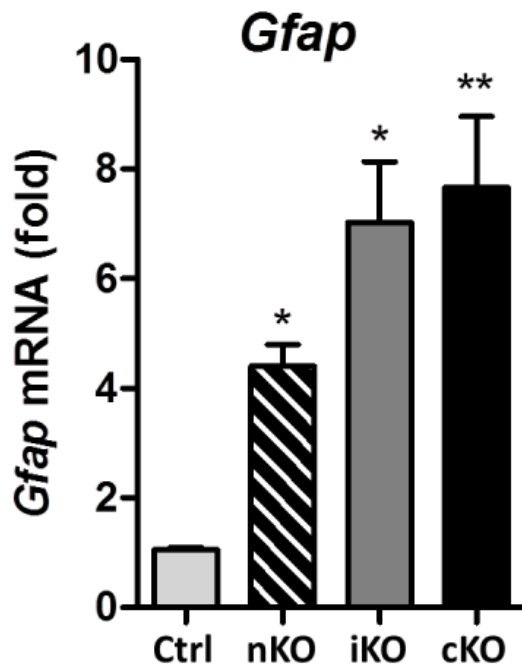

**Fig. S6. iKO mice display similar *Gfap* induction in the brain as cKO.** Cerebral cortex samples harvested from Ctrl, nKO, iKO, and cKO mice. *Gfap* mRNA level was quantified by qRT-PCR ( $N=4$  to 12, 1-way ANOVA with Bonferroni posttest analysis, as compared to Ctrl group; \*,  $P<0.05$ , \*\*,  $P<0.01$ ).

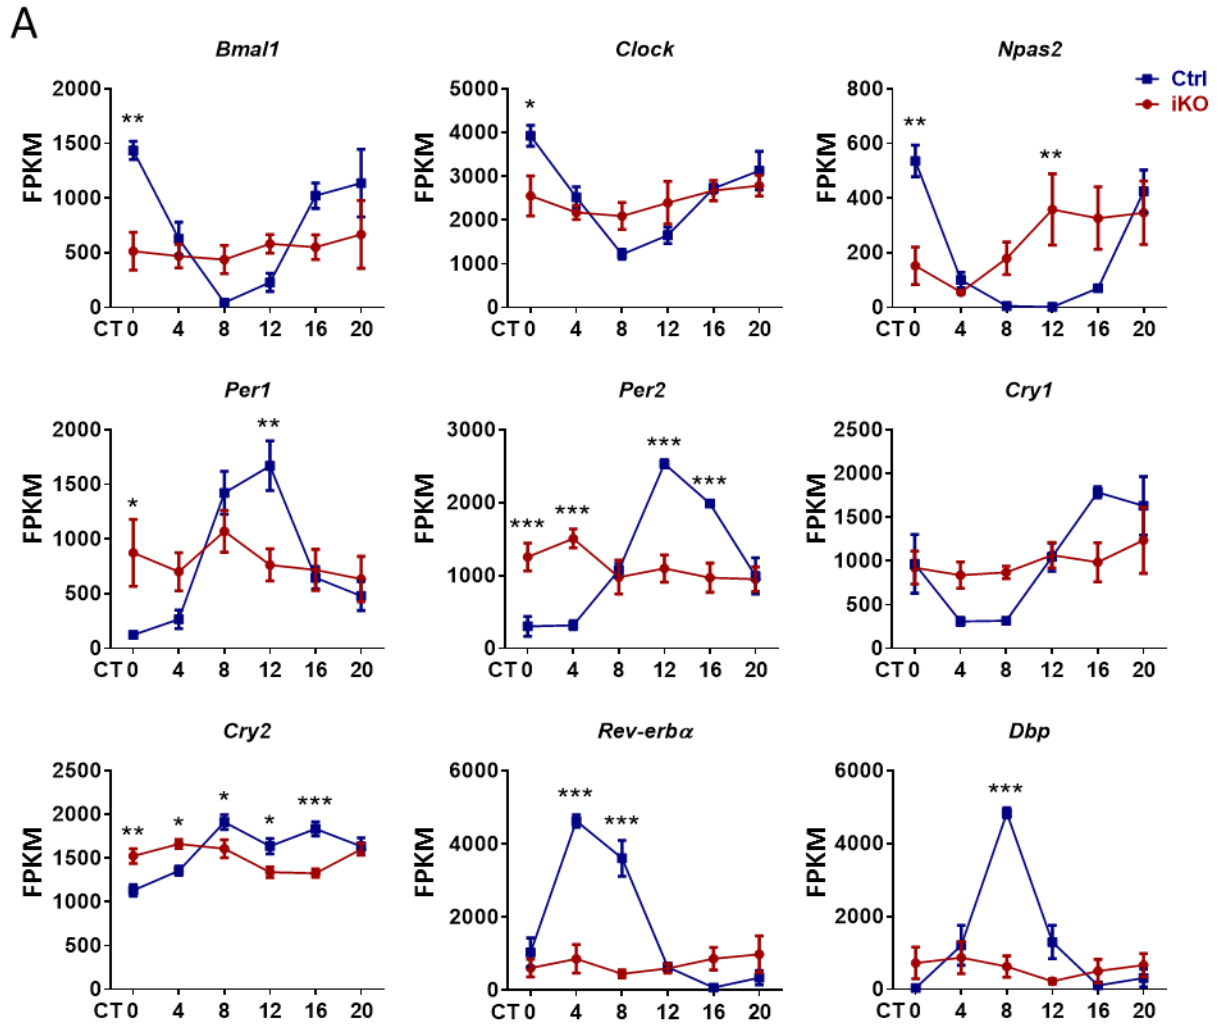

**Fig. S7. RNA-Seq results revealed dampening**

**effect in core clock genes in iKO mice. (A)**

Expression of core clock genes in Ctrl and iKO

mice ( $N=4/\text{genotype}/\text{time point}$ , 2-way ANOVA;

\*,  $P<0.05$ ; \*\*,  $P<0.01$ ; \*\*\*,  $P<0.001$ ). **(B)**

JTK\_CYCLE  $q$ -values of core clock genes in Ctrl

and iKO mice.

**Table S1. Top 20 oscillating hepatic genes (JTK\_CYCLE *q*-value) in Ctrl mice show no circadian pattern in iKO mice**

| Genes           | Ctrl     | iKO    |
|-----------------|----------|--------|
| <i>Tars</i>     | 1.76e-07 | 0.5649 |
| <i>Igfbp4</i>   | 1.49e-06 | 0.6630 |
| <i>Hnrnpl</i>   | 1.49e-06 | 1.0000 |
| <i>Ptprk</i>    | 1.49e-06 | 0.9546 |
| <i>Blcap</i>    | 1.49e-06 | 1.0000 |
| <i>Npas2</i>    | 1.49e-06 | 0.3044 |
| <i>Cald1</i>    | 2.18e-06 | 0.4950 |
| <i>Rfxank</i>   | 2.18e-06 | 1.0000 |
| <i>Gde1</i>     | 2.36e-06 | 0.1105 |
| <i>Spata22</i>  | 2.36e-06 | 0.8014 |
| <i>Crot</i>     | 2.36e-06 | 1.0000 |
| <i>Slc9a3r1</i> | 2.36e-06 | 0.2826 |
| <i>Chka</i>     | 2.36e-06 | 1.0000 |
| <i>St3gal1</i>  | 2.36e-06 | 1.0000 |
| <i>Nr1d2</i>    | 3.14e-06 | 1.0000 |
| <i>Lasp1</i>    | 3.22e-06 | 1.0000 |
| <i>Arntl</i>    | 3.22e-06 | 1.0000 |
| <i>Pitpnb</i>   | 3.22e-06 | 1.0000 |
| <i>Mdfic</i>    | 3.22e-06 | 1.0000 |
| <i>Rnf125</i>   | 4.59e-06 | 1.0000 |

**Table S2. The ratio of differentially expressed gene numbers in cKO strain to the numbers in iKO strain**

| <i>q</i> -value | cKO        | iKO      | Fold (cKO/iKO) |
|-----------------|------------|----------|----------------|
| 0.01            | 234        | 3        | 78             |
| <b>0.05</b>     | <b>462</b> | <b>3</b> | <b>154</b>     |
| 0.1             | 656        | 9        | 73             |
| 0.2             | 998        | 15       | 67             |

**Table S3. Summary of phenotypes of cKO and iKO mice**

| Phenotypes       | cKO            | iKO            | Consistence |
|------------------|----------------|----------------|-------------|
| Circadian rhythm | Loss           | Loss           | √           |
| Life span        | ↓              | -              | ×           |
| Fertility        | ↓              | -              | ×           |
| Body weight      | ↓              | - <sup>2</sup> | ×           |
| Organ weight     | ↓ <sup>1</sup> | -              | ×           |
| Arthropathy      | +              | -              | ×           |
| Astrogliosis     | +              | +              | √           |
| Eye pathologies  | + <sup>3</sup> | +              | √           |
| Hair growth      | ↓              | ↑              | ××          |
| Atherogenesis    | ↑              | ↓              | ××          |

↑, increased; ↓, decreased; +, positive; -, negative/no change; √, yes; ×, no; ××, opposite

1, experiment was not performed in the current study; 2, lower body weight seen in HFD fed mice;

3, histology was not studied, but the ocular abnormalities can be easily seen.

**Data file S1.** Circadian transcriptome. [Excel file]

**Data file S2.** Differentially expressed genes irrespective of time points. [Excel file]

**Data file S3.** Phenotype enrichment analysis of differentially expressed genes. [Excel file]
